# Supplementary material
Source: MDPI journal article supplement (https://www.mdpi.com/2079-3197/10/2/14)
Supplement: s1 [file s1]

# **A Theoretical Survey of the UV-Visible of Axially and Peripherally Substituted Boron Subphthalocyanines.**

Al Mokhtar Lamsabhi, M. Merced Montero-Campillo, Otilia Mó and Manuel Yáñez \*

Departamento de Química, Módulo 13, Facultad de Ciencias and Institute for Advanced Research in Chemical Sciences (IAdChem), Universidad Autónoma de Madrid, 28049 Madrid, Spain

## **Supporting Information**

### **CONTENTS**

**Figure S1.** Comparison between the calculated (red curve) and the experimental (blue curve) UV-visible spectra for SubPc (A2,F,F,F) dissolved in CHCl<sub>3</sub>.

**Figure S2.** Comparison between the UV-visible spectrum of SubPc(A2,H,H,H) in the gas phase (red curve) and in CHCl<sub>3</sub> solution (blue curve).

**Figure S3:** Lowest Unoccupied Molecular Orbital of SubPc(A1,H,H,H), SubPc(A1,SO<sub>2</sub>CH<sub>3</sub>,SO<sub>2</sub>CH<sub>3</sub>,H) and SubPc(A1,NO<sub>2</sub>,H,H).

**Table S1.** B3LYP/6-31G(d) optimized geometries (cartesian coordinates in Å) for the different SubPcs included in this study.

**Table S2.** Q-Band ( $\lambda_{\text{max}}$ ) excitation energies in vacuum, oscillator strengths  $f$  and dominant electronic transitions, for the SubPcs included in this study.

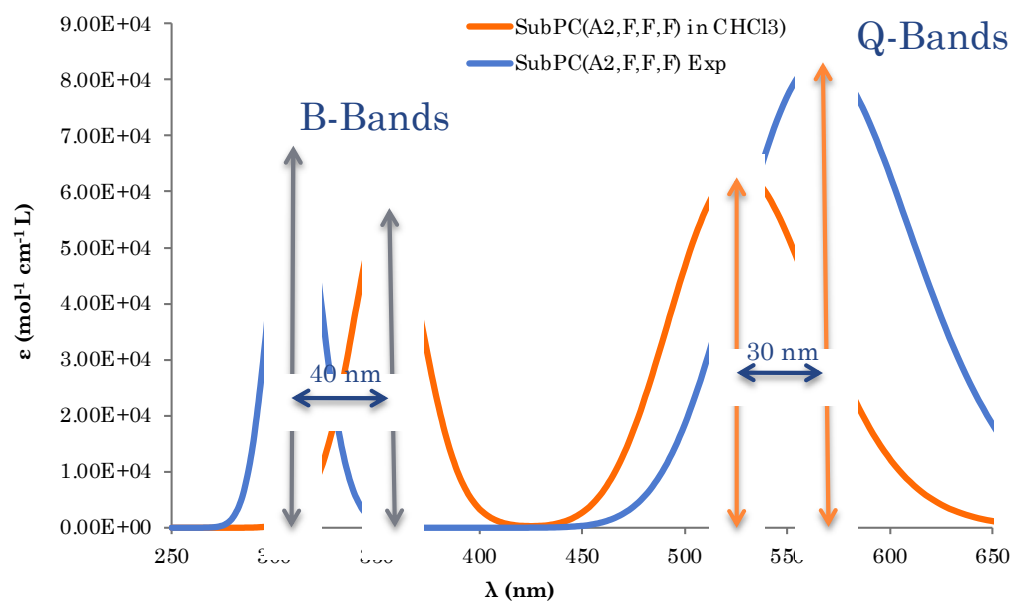

**Figure S1.** Comparison between the calculated (red curve) and the experimental (blue curve) UV-visible spectra for SubPc (A2,F,F,F) dissolved in CHCl<sub>3</sub>.

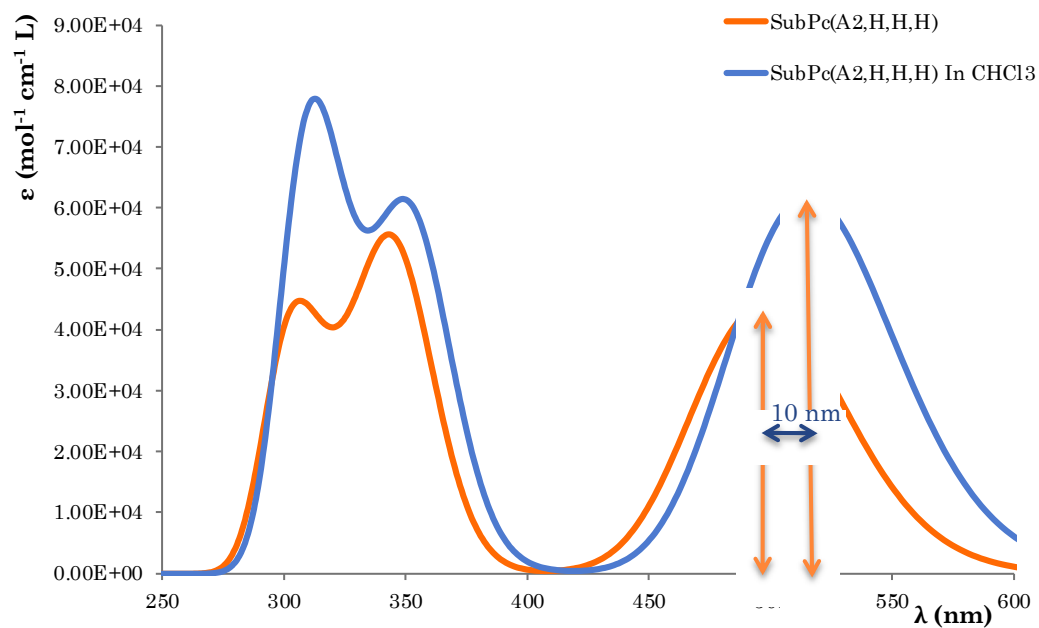

**Figure S2.** Comparison between the UV-visible spectrum of SubPc(A2,H,H,H) in the gas phase (red curve) and in  $\text{CHCl}_3$  solution (blue curve).

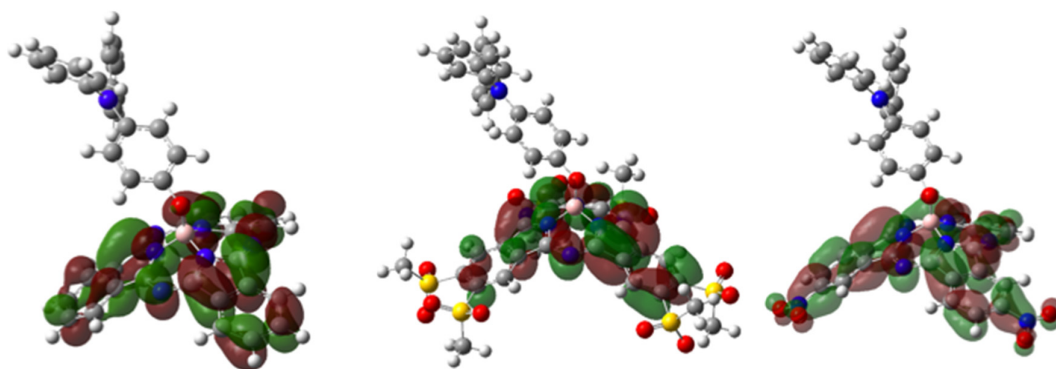

**Figure S3:** Lowest Unoccupied Molecular Orbital of SubPc(A1,H,H,H), SubPc(A1,SO<sub>2</sub>CH<sub>3</sub>,SO<sub>2</sub>CH<sub>3</sub>H,H) and SubPc(A1,NO<sub>2</sub>,H,H).

**Table S1.** B3LYP/6-31G(d) optimized geometries (cartesian coordinates in Å) for the different SubPcs included in this study.

**SubPc(A1,H,H,H)**

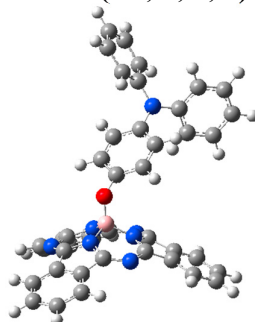

C -2.19754700 -2.32859300 2.52192900  
 C -1.38377500 -1.26032600 3.01600600  
 C -1.00160800 -1.22176200 4.35889900  
 C -1.41029400 -2.26101300 5.19054800  
 C -2.21146100 -3.31209400 4.70445900  
 C -2.62324700 -3.34956700 3.37492400  
 C -2.49719800 -2.02958700 1.12708700  
 C -1.19605500 -0.32084100 1.91755600  
 H -0.39881700 -0.40144200 4.73596900  
 H -3.25573400 -4.14952800 3.00271300  
 N -0.86586400 0.97956700 1.93745100  
 N -1.74793100 -0.92443900 0.81901800  
 N -3.49524500 -2.46752100 0.34412800  
 C -1.24433700 1.72718800 0.88946700  
 C -2.59307400 2.06451800 -0.92841200  
 C -1.48794000 3.16121900 0.79646600  
 C -2.33128200 3.37219100 -0.34008200  
 C -1.13075700 4.22891200 1.62313200  
 C -2.81102200 4.64916300 -0.64077000  
 C -1.59378800 5.50030000 1.29479300  
 H -0.50553400 4.06419000 2.49515500  
 C -2.42385400 5.70790500 0.17638900  
 H -3.46554100 4.80441700 -1.49283500  
 C -3.85946200 -1.68854200 -0.68647900  
 C -3.90742300 0.35646700 -1.71312900  
 C -5.13242100 -1.59175800 -1.39012800  
 C -5.16239900 -0.31298400 -2.03211000  
 C -6.24192200 -2.43851300 -1.44283600  
 C -6.30163000 0.10850700 -2.72149200  
 C -7.35984700 -2.01628000 -2.15746400  
 H -6.22405400 -3.40067700 -0.94042700  
 C -7.38934000 -0.75811700 -2.78907700  
 H -6.32922900 1.08602700 -3.19285500  
 N -3.15304000 -0.57606000 -1.05476300  
 N -1.79736700 1.18611500 -0.24065400  
 N -3.59199100 1.66101100 -1.72855300  
 B -1.77212100 -0.28984400 -0.54848500  
 O -0.78243500 -0.74026200 -1.48931500

C 0.56195000 -0.60735000 -1.25563300  
C 1.24502700 0.54096600 -1.67477100  
C 1.27908400 -1.64412100 -0.64636100  
C 2.62059500 0.65002200 -1.48646200  
H 0.69199600 1.33285200 -2.17060400  
C 2.65120700 -1.52493300 -0.43948100  
H 0.74952100 -2.53868100 -0.33312600  
C 3.34008200 -0.37702100 -0.85791100  
H 3.14590900 1.53767100 -1.82544600  
H 3.19843500 -2.32775200 0.04505200  
N 4.74670600 -0.25746800 -0.65245400  
C 5.27330100 0.93462500 -0.09125900  
C 6.48598800 1.47306400 -0.55518700  
C 4.58327800 1.60595400 0.93255800  
C 6.99617200 2.64378900 0.00187100  
H 7.02245900 0.96939100 -1.35282800  
C 5.09374400 2.78574200 1.47028400  
H 3.64750600 1.19797000 1.30075100  
C 6.30439600 3.31168800 1.01469900  
H 7.93547300 3.04360500 -0.37186000  
H 4.54429900 3.28895900 2.26193500  
H 6.70214400 4.22820600 1.44114300  
C 5.60057500 -1.33459600 -1.00632600  
C 6.69262800 -1.68368700 -0.19338100  
C 5.35995100 -2.08031800 -2.17269900  
C 7.52548900 -2.74262000 -0.54889800  
H 6.88204400 -1.12145700 0.71534700  
C 6.18851500 -3.14876300 -2.50965100  
H 4.52148000 -1.81702400 -2.80935500  
C 7.27920800 -3.48573800 -1.70541800  
H 8.36465100 -2.99663400 0.09383300  
H 5.98498300 -3.71259200 -3.41649800  
H 7.92667800 -4.31526000 -1.97505300  
H -1.31515200 6.34829200 1.91408400  
H -2.77137400 6.71248000 -0.04792000  
H -1.11112400 -2.26049000 6.23493400  
H -2.51675100 -4.10437000 5.38222000  
H -8.22816900 -2.66554500 -2.22621400  
H -8.27991700 -0.45828800 -3.33426600

**SubPc(A1,F,F,F)**

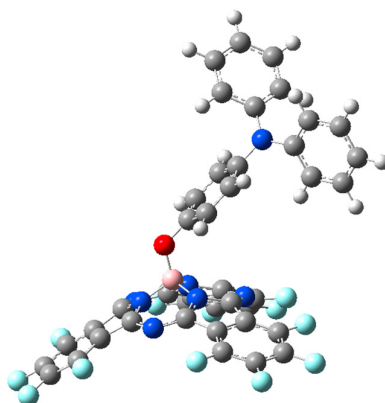

C -1.30100400 -2.88263300 1.74466300  
 C -0.39115400 -1.98882300 2.40076800  
 C 0.10109100 -2.29640200 3.66626000  
 C -0.28678600 -3.49031700 4.26792000  
 C -1.17712300 -4.36503600 3.62586400  
 C -1.69628800 -4.06200800 2.37031600  
 C -1.71062400 -2.24249000 0.50276900  
 C -0.25653500 -0.81396200 1.55160400  
 N 0.14247300 0.42955800 1.85098500  
 N -0.93443100 -1.11912200 0.40279200  
 N -2.79178000 -2.44951800 -0.26134500  
 C -0.28302800 1.41596700 1.05030800  
 C -1.76363700 2.22526600 -0.50147800  
 C -0.44812100 2.83783300 1.31564500  
 C -1.37468600 3.34424300 0.34494700  
 C 0.03134900 3.66847200 2.32485400  
 C -1.79943500 4.66876900 0.40790300  
 C -0.38610000 4.99594600 2.35982200  
 C -1.29306800 5.49151600 1.41010400  
 C -3.19692600 -1.43418200 -1.03682500  
 C -3.22360000 0.80269400 -1.53943000  
 C -4.51179100 -1.13312400 -1.58466800  
 C -4.52848000 0.26650400 -1.89910900  
 C -5.66458400 -1.89836800 -1.73892700  
 C -5.69751600 0.86594800 -2.35989500  
 C -6.81839000 -1.28798800 -2.22265900  
 C -6.83470200 0.08135900 -2.53027400  
 N -2.47183500 -0.28563900 -1.19331600  
 N -0.96167200 1.18489800 -0.11529500  
 N -2.84547800 2.06103800 -1.27493600  
 B -1.03461800 -0.17436200 -0.77293800  
 O -0.16072000 -0.41355700 -1.87599700  
 C 1.20929700 -0.37624600 -1.74217500  
 C 1.90633700 0.82208400 -1.93027000  
 C 1.92258600 -1.54864200 -1.47137100  
 C 3.29593700 0.84773300 -1.84334800  
 H 1.35366500 1.72463200 -2.17330700  
 C 3.31083500 -1.51827600 -1.36407600  
 H 1.38067500 -2.48083200 -1.34305500

C 4.01764100 -0.31961700 -1.54851300  
 H 3.83115800 1.77813800 -2.00451300  
 H 3.85612500 -2.42981800 -1.14086100  
 N 5.43573600 -0.28746000 -1.44385800  
 C 6.06491900 0.76341000 -0.72273000  
 C 7.23768800 1.36303900 -1.21087800  
 C 5.52037500 1.22316300 0.48772200  
 C 7.85244200 2.38970300 -0.49683900  
 H 7.66131100 1.01943500 -2.14919200  
 C 6.13272600 2.26284300 1.18504300  
 H 4.61848800 0.76124100 0.87670800  
 C 7.30386000 2.85038200 0.70202000  
 H 8.75938600 2.84143400 -0.89044100  
 H 5.69698000 2.60393100 2.12060500  
 H 7.78239000 3.65560800 1.25206300  
 C 6.21435000 -1.30687300 -2.05506100  
 C 7.33356800 -1.84328500 -1.39692300  
 C 5.87424900 -1.79879500 -3.32611000  
 C 8.09618600 -2.83919900 -2.00379800  
 H 7.59969500 -1.47501300 -0.41131600  
 C 6.63262600 -2.80799900 -3.91634600  
 H 5.01533900 -1.38579100 -3.84541600  
 C 7.75031300 -3.33230600 -3.26377900  
 H 8.95870300 -3.24170800 -1.47883300  
 H 6.35371500 -3.17539600 -4.90059600  
 H 8.34316500 -4.11387600 -3.73023100  
 F -7.96202900 0.62490200 -2.99413500  
 F -5.75122600 2.16645300 -2.65165100  
 F -7.93074400 -2.00307800 -2.40376600  
 F -5.68732900 -3.19959200 -1.44629900  
 F -2.54822100 -4.91091600 1.79320700  
 F -1.51982500 -5.50058000 4.23792600  
 F 0.18874900 -3.82177500 5.47021400  
 F 0.94044900 -1.48326600 4.30944600  
 F 0.88628600 3.22788200 3.24937900  
 F 0.07652600 5.82070600 3.30184800  
 F -1.66411700 6.77178000 1.47920000  
 F -2.66761000 5.16972700 -0.47230600

**SubPc(A1,SO<sub>2</sub>H,H,H)**

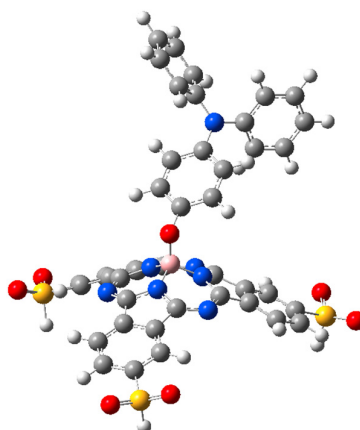

C 1.26438 3.01167 1.49607  
C 0.29555 2.20486 2.174  
C -0.25664 2.61592 3.38974  
C 0.14345 3.83985 3.91639  
C 1.1062 4.61577 3.2436  
C 1.68598 4.22469 2.03973  
C 1.69148 2.27072 0.31483  
C 0.14522 0.97914 1.39915  
H -0.98913 1.99943 3.90053  
H 2.41989 4.85079 1.5437  
N -0.31032 -0.22568 1.77223  
N 0.87783 1.17136 0.25944  
N 2.81085 2.38082 -0.41455  
C 0.11014 -1.28526 1.0671  
C 1.61942 -2.25834 -0.35073  
C 0.22181 -2.68676 1.45367  
C 1.16508 -3.29674 0.56633  
C -0.33881 -3.4121 2.5043  
C 1.5406 -4.63302 0.7264  
C 0.04109 -4.74576 2.62824  
H -1.05434 -2.96906 3.18864  
C 0.95851 -5.36354 1.75739  
H 2.25829 -5.08995 0.05285  
H 1.19157 -6.41449 1.89233  
C 3.21053 1.29682 -1.09629  
C 3.17522 -0.96714 -1.42771  
C 4.5418 0.91129 -1.54861  
C 4.51942 -0.50546 -1.75413  
C 5.72112 1.64194 -1.71359  
C 5.67899 -1.19027 -2.11596  
C 6.87028 0.96149 -2.10311  
H 5.73313 2.71528 -1.55449  
C 6.83461 -0.4334 -2.28913  
H 5.68486 -2.26322 -2.27531  
H 7.79741 1.49597 -2.28136  
N 2.44686 0.1675 -1.20141  
N 0.84106 -1.16433 -0.08291  
N 2.73919 -2.18811 -1.08561



B 0.98909 0.13711 -0.83889  
O 0.1704 0.31845 -1.99188  
C -1.20592 0.3068 -1.91611  
C -1.91134 -0.8869 -2.10012  
C -1.91295 1.49569 -1.70946  
C -3.30353 -0.89202 -2.07393  
H -1.36183 -1.8035 -2.29265  
C -3.30491 1.48648 -1.66091  
H -1.36502 2.42489 -1.58509  
C -4.02119 0.29267 -1.84314  
H -3.8435 -1.81995 -2.23266  
H -3.84508 2.41159 -1.48697  
N -5.44177 0.28296 -1.80047  
C -6.12167 -0.75907 -1.11224  
C -7.27599 -1.34192 -1.66038  
C -5.64747 -1.22534 0.12489  
C -7.94123 -2.35952 -0.97925  
H -7.64549 -0.99279 -2.61931  
C -6.30883 -2.25658 0.78927  
H -4.76033 -0.77554 0.55946  
C -7.46146 -2.82772 0.24585  
H -8.83286 -2.79869 -1.41924  
H -5.92649 -2.60534 1.74509  
H -7.97796 -3.62685 0.76968  
C -6.17852 1.31288 -2.44653  
C -7.30884 1.87517 -1.83082  
C -5.7864 1.78693 -3.70915  
C -8.03162 2.88008 -2.47081  
H -7.61496 1.51946 -0.85219  
C -6.50505 2.80524 -4.33263  
H -4.91861 1.35315 -4.19581  
C -7.6338 3.35585 -3.72209  
H -8.90368 3.30304 -1.9788  
H -6.18647 3.15902 -5.30977  
H -8.19551 4.14453 -4.21438  
H -0.2896 4.21522 4.83756  
S -0.66746 -5.71473 3.96351  
O -1.88541 -5.04046 4.42224  
O -0.63942 -7.12666 3.57144  
H 0.27274 -5.55586 4.94844  
S 8.34671 -1.27896 -2.76154  
O 7.98555 -2.58191 -3.32712  
O 9.21039 -0.32092 -3.45742  
H 8.92072 -1.51833 -1.53978  
S 1.61797 6.17564 3.97125  
O 2.2371 6.98949 2.92132  
O 0.52798 6.66593 4.81956  
H 2.62429 5.77103 4.8097

**SubPc(A1,SO<sub>2</sub>CH<sub>3</sub>,H,H)**

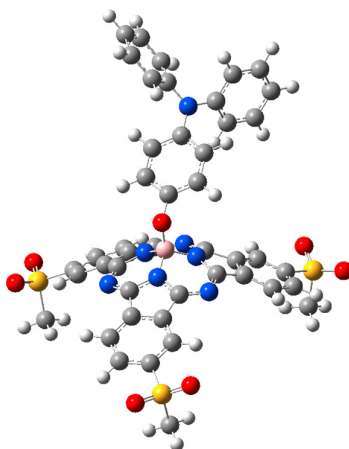

C 1.08968 3.07272 1.26468  
C 0.11586 2.29097 1.96409  
C -0.42577 2.7364 3.1726  
C -0.00868 3.96713 3.66965  
C 0.96174 4.71793 2.97935  
C 1.5275 4.29258 1.78053  
C 1.50062 2.30333 0.09593  
C -0.05364 1.05167 1.21522  
H -1.16542 2.14182 3.69903  
H 2.26111 4.90245 1.2641  
N -0.52131 -0.14034 1.61412  
N 0.67369 1.21277 0.06706  
N 2.61686 2.38516 -0.64219  
C -0.11974 -1.21855 0.92585  
C 1.36699 -2.2371 -0.484  
C -0.0252 -2.61471 1.33618  
C 0.90321 -3.25283 0.45323  
C -0.58987 -3.31508 2.40224  
C 1.25601 -4.59294 0.63184  
C -0.23099 -4.6521 2.54867  
H -1.2984 -2.85189 3.0806  
C 0.66807 -5.29694 1.67784  
H 1.95906 -5.07367 -0.04077  
H 0.87921 -6.35154 1.82168  
C 2.99852 1.28356 -1.30611  
C 2.93303 -0.98569 -1.59406  
C 4.32214 0.87242 -1.7576  
C 4.28138 -0.54742 -1.93576  
C 5.50987 1.58387 -1.94444  
C 5.43141 -1.25346 -2.28934  
C 6.64838 0.88033 -2.32445  
H 5.53585 2.6605 -1.81047  
C 6.59798 -0.51799 -2.47993  
H 5.42091 -2.32856 -2.43379  
H 7.57953 1.40051 -2.52369  
N 2.2198 0.16226 -1.38569  
N 0.60528 -1.12795 -0.2309

N 2.48382 -2.19448 -1.22585  
B 0.76497 0.15665 -1.01165  
O -0.06102 0.32639 -2.16268  
C -1.43612 0.31463 -2.07839  
C -2.14162 -0.88169 -2.24543  
C -2.1436 1.50461 -1.87851  
C -3.53348 -0.8887 -2.20718  
H -1.59218 -1.79937 -2.43287  
C -3.53505 1.49354 -1.81718  
H -1.5964 2.43601 -1.76818  
C -4.25077 0.29685 -1.98051  
H -4.07326 -1.81904 -2.35201  
H -4.07528 2.41936 -1.6471  
N -5.6713 0.28562 -1.92284  
C -6.34224 -0.74818 -1.21445  
C -7.50516 -1.33515 -1.73983  
C -5.85015 -1.20393 0.0197  
C -8.16069 -2.34614 -1.03978  
H -7.8886 -0.99555 -2.69675  
C -6.50188 -2.22903 0.70282  
H -4.95609 -0.75148 0.43709  
C -7.66296 -2.80413 0.18197  
H -9.05885 -2.78877 -1.46281  
H -6.10463 -2.57011 1.65532  
H -8.17163 -3.59869 0.72024  
C -6.41498 1.3058 -2.57575  
C -7.5374 1.87928 -1.95578  
C -6.03638 1.76056 -3.84957  
C -8.26559 2.87593 -2.60249  
H -7.83251 1.53938 -0.96815  
C -6.76019 2.77079 -4.48004  
H -5.17441 1.31833 -4.33894  
C -7.88101 3.33254 -3.86502  
H -9.1312 3.30797 -2.10692  
H -6.45195 3.1096 -5.46578  
H -8.44673 4.11518 -4.36237  
H -0.4394 4.37049 4.58026  
S -0.96065 -5.59774 3.9031  
O -2.16987 -4.88536 4.34224  
O -1.00845 -7.00789 3.48931  
S 8.10444 -1.39445 -2.95404  
O 7.7061 -2.68781 -3.52883  
O 8.954 -0.45238 -3.6976  
S 1.48479 6.3047 3.66524  
O 2.08728 7.08406 2.57366  
O 0.36954 6.83561 4.46306  
C 0.26546 -5.46046 5.22888  
H -0.13359 -6.02944 6.07251  
H 1.21026 -5.89287 4.89387  
H 0.38517 -4.41029 5.50192

C 2.81133 5.85764 4.81451  
H 3.1552 6.79424 5.26088  
H 2.41377 5.19464 5.58544  
H 3.62264 5.38049 4.26149  
C 8.91796 -1.72888 -1.37082  
H 9.13829 -0.78381 -0.87064  
H 8.26999 -2.35936 -0.75894  
H 9.84499 -2.25606 -1.61041

**SubPc(A1,SO<sub>2</sub>CH<sub>3</sub>,SO<sub>2</sub>CH<sub>3</sub>,H)**

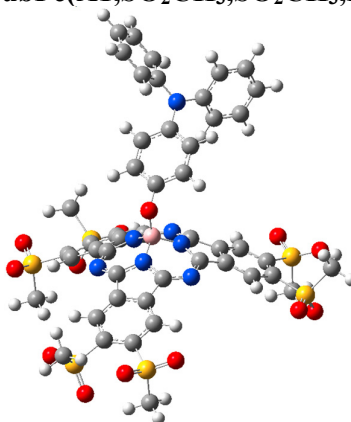

C -0.41525 -3.1534 0.80967  
C 0.66104 -2.43263 1.4022  
C 1.34919 -2.96229 2.49291  
C 0.9933 -4.22185 2.97247  
C -0.08489 -4.93945 2.38415  
C -0.79094 -4.39927 1.3105  
C -0.98417 -2.30322 -0.22914  
C 0.74614 -1.14594 0.72192  
H 2.14895 -2.41326 2.97748  
H -1.60756 -4.96164 0.87148  
N 1.29542 0.00888 1.12219  
N -0.14911 -1.22106 -0.31034  
N -2.20113 -2.3233 -0.79013  
C 0.81428 1.13542 0.57904  
C -0.85396 2.26329 -0.50857  
C 0.80714 2.49866 1.09499  
C -0.23233 3.20041 0.41963  
C 1.53639 3.12006 2.10776  
C -0.53686 4.51586 0.76763  
C 1.24968 4.44418 2.43538  
H 2.33122 2.60055 2.63129  
C 0.21421 5.14637 1.75835  
H -1.34721 5.05429 0.28872  
C -2.65762 -1.17415 -1.30765  
C -2.59131 1.10943 -1.45136  
C -4.02492 -0.7143 -1.51939  
C -3.98344 0.70687 -1.61005  
C -5.24527 -1.38783 -1.54941  
C -5.16221 1.44108 -1.73401

C -6.42051 -0.65478 -1.70561  
H -5.29859 -2.46617 -1.44843  
C -6.37962 0.76461 -1.79057  
H -5.14889 2.52306 -1.80453  
N -1.87814 -0.05755 -1.43293  
N -0.08157 1.1341 -0.4555  
N -2.06857 2.28486 -1.07454  
B -0.38178 -0.09158 -1.29111  
O 0.25307 -0.18798 -2.5615  
C 1.62706 -0.21273 -2.68591  
C 2.34012 0.97767 -2.85961  
C 2.31406 -1.43062 -2.693  
C 3.72159 0.95078 -3.03148  
H 1.80118 1.91999 -2.88886  
C 3.69852 -1.45576 -2.84321  
H 1.75712 -2.35576 -2.57841  
C 4.42385 -0.26542 -3.01445  
H 4.26543 1.87797 -3.18044  
H 4.22499 -2.4047 -2.83443  
N 5.83495 -0.28916 -3.17165  
C 6.63754 0.68038 -2.50818  
C 7.71183 1.29231 -3.1739  
C 6.36642 1.04199 -1.17857  
C 8.49898 2.23676 -2.51762  
H 7.92396 1.02273 -4.20365  
C 7.14743 2.00145 -0.53675  
H 5.54318 0.56725 -0.65399  
C 8.22056 2.60181 -1.19871  
H 9.32668 2.70005 -3.04835  
H 6.9228 2.26929 0.49237  
H 8.8316 3.3439 -0.69306  
C 6.44405 -1.27878 -3.99104  
C 7.62897 -1.91196 -3.58162  
C 5.87072 -1.63954 -5.22134  
C 8.22715 -2.87567 -4.39116  
H 8.07542 -1.64301 -2.62961  
C 6.46651 -2.618 -6.01501  
H 4.95969 -1.14926 -5.54965  
C 7.64944 -3.23946 -5.60944  
H 9.1443 -3.35459 -4.05815  
H 6.00857 -2.88392 -6.96422  
H 8.11491 -3.99628 -6.23428  
S 2.37825 5.12882 3.7143  
O 3.43246 4.11964 3.89598  
O 2.74388 6.49647 3.31429  
S -7.81282 1.8845 -2.05637  
O -7.23675 3.2061 -2.3457  
O -8.70935 1.25225 -3.03643  
S -0.65129 -6.62727 2.84135  
O -1.58847 -7.03266 1.78327

O 0.5387 -7.44885 3.11175  
C 1.41679 5.1804 5.23816  
H 2.10086 5.56849 5.99771  
H 0.56345 5.84283 5.09787  
H 1.11711 4.16041 5.48677  
C -1.60681 -6.42837 4.35686  
H -1.95743 -7.43251 4.61038  
H -0.95947 -6.0264 5.13535  
H -2.45551 -5.77623 4.14142  
C -8.64483 1.99988 -0.46138  
H -8.99238 1.00977 -0.16889  
H -7.94349 2.42592 0.25876  
H -9.48251 2.68393 -0.62221  
S -0.35159 6.85929 2.10918  
O -1.60377 7.02761 1.3565  
O -0.35062 7.05009 3.56786  
S -7.92959 -1.70358 -1.68633  
O -7.47425 -3.05013 -1.30887  
O -8.94608 -1.02559 -0.86696  
S 1.98107 -4.74038 4.43299  
O 2.76966 -3.56078 4.8199  
O 1.06625 -5.35306 5.40866  
C 3.13671 -5.98234 3.82394  
H 3.76928 -5.51646 3.06579  
H 3.73641 -6.26889 4.69211  
H 2.57434 -6.82968 3.43342  
C 0.87674 7.94241 1.35618  
H 1.84317 7.76482 1.8265  
H 0.89279 7.74472 0.28256  
H 0.52158 8.95859 1.54775  
C -8.48802 -1.78586 -3.39811  
H -7.69591 -2.24446 -3.9933  
H -9.37072 -2.4309 -3.38298  
H -8.73648 -0.78159 -3.73938

**SubPc(A1,NO<sub>2</sub>,H,H)**

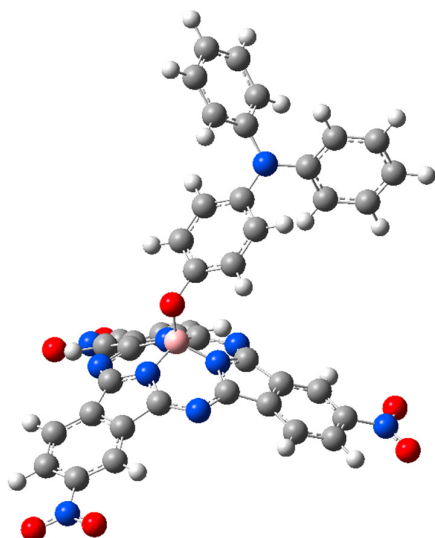

C -1.47675 -2.88256 1.74208  
 C -0.57504 -1.99351 2.4105  
 C -0.09699 -2.29017 3.68995  
 C -0.49574 -3.4801 4.28645  
 C -1.38197 -4.33688 3.61165  
 C -1.8996 -4.0615 2.35083  
 C -1.85511 -2.24725 0.48469  
 C -0.41405 -0.82679 1.55314  
 H 0.57299 -1.60772 4.20219  
 H -2.59479 -4.74386 1.878  
 N -0.01617 0.41754 1.85689  
 N -1.07134 -1.12903 0.3909  
 N -2.92459 -2.45064 -0.29673  
 C -0.42618 1.40559 1.05001  
 C -1.87659 2.21856 -0.52207  
 C -0.60226 2.82793 1.32065  
 C -1.51042 3.33646 0.33731  
 C -0.13005 3.64317 2.34596  
 C -1.94362 4.66465 0.38448  
 C -0.56016 4.96546 2.34458  
 H 0.54295 3.28203 3.11345  
 C -1.45089 5.48655 1.39062  
 H -2.64532 5.04419 -0.35078  
 H -1.74132 6.52699 1.46353  
 C -3.31584 -1.43449 -1.08068  
 C -3.32673 0.79833 -1.58265  
 C -4.62819 -1.12947 -1.63485  
 C -4.63508 0.26775 -1.9492  
 C -5.77996 -1.90402 -1.79903  
 C -5.78837 0.88712 -2.42379  
 C -6.92295 -1.29302 -2.29997  
 H -5.77836 -2.95869 -1.54474  
 C -6.90638 0.07958 -2.60082  
 H -5.82903 1.94466 -2.6527  
 H -7.83706 -1.85017 -2.46171

N -2.5801 -0.29093 -1.22934  
N -1.08239 1.17445 -0.1279  
N -2.9478 2.05536 -1.31284  
B -1.14783 -0.18472 -0.78805  
O -0.25807 -0.42618 -1.8763  
C 1.11064 -0.38451 -1.72309  
C 1.80772 0.81197 -1.92136  
C 1.82266 -1.55058 -1.42371  
C 3.19613 0.84212 -1.81828  
H 1.25667 1.70942 -2.18613  
C 3.2094 -1.51554 -1.2996  
H 1.28175 -2.48227 -1.28765  
C 3.91699 -0.31887 -1.49604  
H 3.73083 1.77101 -1.9891  
H 3.75308 -2.42251 -1.05514  
N 5.3331 -0.28392 -1.37797  
C 5.95907 0.79296 -0.69287  
C 7.13354 1.37468 -1.19789  
C 5.41073 1.29516 0.49879  
C 7.74586 2.4262 -0.5187  
H 7.56042 0.99772 -2.12179  
C 6.02042 2.35922 1.16079  
H 4.50759 0.84641 0.90027  
C 7.19311 2.92931 0.66097  
H 8.65418 2.8637 -0.92486  
H 5.58203 2.73419 2.08207  
H 7.66943 3.75387 1.18349  
C 6.11813 -1.32294 -1.94841  
C 7.22402 -1.84359 -1.25643  
C 5.7983 -1.84786 -3.21125  
C 7.99407 -2.85768 -1.82256  
H 7.47428 -1.4485 -0.27702  
C 6.56357 -2.8749 -3.76058  
H 4.94994 -1.44646 -3.75641  
C 7.66808 -3.38396 -3.07439  
H 8.8464 -3.24786 -1.27236  
H 6.30093 -3.26827 -4.73921  
H 8.26649 -4.17947 -3.50905  
N -8.13928 0.69775 -3.12212  
O -8.10898 1.90078 -3.37699  
O -9.12184 -0.02755 -3.26851  
N -0.06231 5.8631 3.40282  
O -0.45732 7.0279 3.39392  
O 0.71691 5.39116 4.22958  
H -0.14273 -3.76582 5.26928  
N -1.79121 -5.58733 4.27709  
O -2.56913 -6.32488 3.67373  
O -1.33018 -5.81483 5.39449

**SubPc(Al,NO<sub>2</sub>,NO<sub>2</sub>,H)**



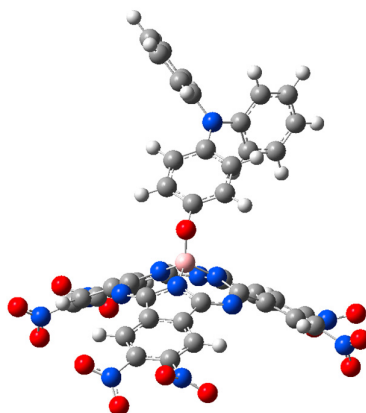

C -0.92552 -3.02171 1.3468  
C 0.03149 -2.19589 2.01294  
C 0.60342 -2.59921 3.2193  
C 0.23252 -3.83303 3.73359  
C -0.73018 -4.63759 3.08854  
C -1.31948 -4.24112 1.89687  
C -1.38912 -2.28451 0.17799  
C 0.14674 -0.96438 1.24218  
H 1.33196 -1.99243 3.74418  
H -2.06899 -4.86931 1.42989  
N 0.58354 0.24656 1.61376  
N -0.59984 -1.16848 0.11439  
N -2.51806 -2.41683 -0.53167  
C 0.12681 1.29863 0.9212  
C -1.42776 2.2447 -0.4653  
C -0.01038 2.6941 1.31841  
C -0.97888 3.286 0.45051  
C 0.55244 3.42707 2.36291  
C -1.39355 4.60403 0.63957  
C 0.16131 4.74948 2.51308  
H 1.2891 3.00241 3.03477  
C -0.81281 5.32671 1.67153  
H -2.15238 5.06474 0.01795  
C -2.95145 -1.33865 -1.19968  
C -2.97103 0.92686 -1.52105  
C -4.29727 -0.97691 -1.62634  
C -4.31032 0.43847 -1.82371  
C -5.46751 -1.72449 -1.75391  
C -5.49052 1.09944 -2.16347  
C -6.63047 -1.05648 -2.10841  
H -5.49163 -2.79314 -1.57555  
C -6.63794 0.33729 -2.32679  
H -5.52748 2.17112 -2.32028  
N -2.21491 -0.19303 -1.31463  
N -0.62025 1.16814 -0.21707  
N -2.55688 2.15553 -1.18126  
B -0.74801 -0.13362 -0.9827  
O 0.04878 -0.29247 -2.14524

C 1.43053 -0.2847 -2.08943  
C 2.13582 0.91434 -2.2275  
C 2.13521 -1.4839 -1.95144  
C 3.52833 0.91436 -2.22355  
H 1.5882 1.84091 -2.37262  
C 3.52758 -1.48169 -1.927  
H 1.58644 -2.4171 -1.86534  
C 4.24716 -0.2825 -2.06395  
H 4.06761 1.84741 -2.34989  
H 4.06575 -2.41646 -1.80896  
N 5.66469 -0.28064 -2.05072  
C 6.3704 0.75869 -1.382  
C 7.49424 1.35269 -1.97789  
C 5.95627 1.20299 -0.11604  
C 8.18933 2.36271 -1.31534  
H 7.8172 1.01727 -2.95831  
C 6.64697 2.22619 0.53088  
H 5.095 0.73997 0.35556  
C 7.76906 2.80993 -0.06092  
H 9.05732 2.8114 -1.79115  
H 6.31462 2.55681 1.51155  
H 8.3095 3.60184 0.44942  
C 6.38703 -1.31309 -2.71352  
C 7.50892 -1.89739 -2.10456  
C 5.99072 -1.7599 -3.98411  
C 8.22063 -2.90078 -2.7595  
H 7.8177 -1.55973 -1.12029  
C 6.69769 -2.7771 -4.62295  
H 5.13012 -1.30603 -4.46546  
C 7.81823 -3.35098 -4.0187  
H 9.08715 -3.34194 -2.27401  
H 6.3776 -3.1109 -5.6065  
H 8.3712 -4.13821 -4.52291  
N -7.82921 1.03444 -2.851  
O -8.04037 2.16405 -2.42191  
O -8.47281 0.4523 -3.71548  
N 0.89649 5.54988 3.51239  
O 1.21757 6.68487 3.18164  
O 1.17926 4.99111 4.56716  
N -1.25261 -5.87002 3.71026  
O -1.53109 -6.79446 2.95333  
O -1.42279 -5.84714 4.92334  
N 0.97666 -4.31066 4.91597  
O 1.31813 -5.48712 4.91409  
O 1.24485 -3.47551 5.77339  
N -7.87573 -1.84873 -2.11598  
O -8.86927 -1.32002 -1.6317  
O -7.79887 -2.99347 -2.55025  
N -1.3554 6.67557 1.92564  
O -1.64529 7.34794 0.94132

O -1.52853 6.9893 3.09722

**SubPc(A2,H,H,H)**

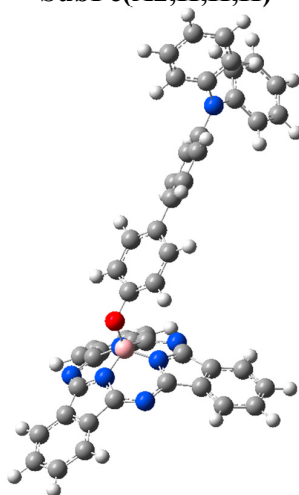

C 3.92232 3.20494 -1.12677  
C 3.08157 3.23748 0.03063  
C 2.69763 4.45602 0.59519  
C 3.1319 5.63038 -0.01385  
C 3.95971 5.59845 -1.15261  
C 4.37314 4.39143 -1.7101  
C 4.21544 1.80437 -1.40454  
C 2.871 1.85664 0.44678  
N 2.50851 1.35765 1.63821  
N 3.43829 1.08645 -0.53352  
N 5.22572 1.25344 -2.09495  
C 2.8676 0.09436 1.91212  
C 4.20917 -1.71898 1.52554  
C 3.07396 -0.56744 3.19423  
C 3.91294 -1.7011 2.9527  
C 2.68751 -0.23432 4.49443  
C 4.35957 -2.4924 4.01363  
C 3.11761 -1.04863 5.53875  
C 3.94369 -2.16405 5.30123  
C 5.57163 -0.00584 -1.78487  
C 5.56858 -1.76548 -0.32126  
C 6.84262 -0.70086 -1.94732  
C 6.84071 -1.80119 -1.03208  
C 7.97352 -0.42037 -2.71747  
C 7.96969 -2.61191 -0.89463  
C 9.08122 -1.2543 -2.58992  
C 9.07932 -2.3369 -1.68947  
N 4.83764 -0.78195 -0.92986  
N 3.43527 -0.72997 0.97713  
N 5.21951 -2.29934 0.85977  
B 3.44884 -0.42082 -0.49851  
O 2.47413 -1.09685 -1.31125  
C 1.12528 -0.94156 -1.12844  
C 0.41922 -1.81743 -0.29538

C 0.42664 0.05644 -1.81826  
C -0.9594 -1.68671 -0.14976  
H 0.96186 -2.59597 0.23229  
C -0.95241 0.17723 -1.66781  
H 0.97205 0.71644 -2.48603  
C -1.6772 -0.6872 -0.82914  
H -1.48543 -2.35912 0.52249  
H -1.48068 0.93931 -2.23431  
C -3.14588 -0.55309 -0.67162  
C -3.97405 -1.68013 -0.53056  
C -3.76852 0.70711 -0.65673  
C -5.35052 -1.55897 -0.37102  
H -3.53399 -2.67311 -0.55711  
C -5.14643 0.83882 -0.51968  
H -3.16127 1.60384 -0.74361  
C -5.96079 -0.29469 -0.36853  
H -5.96311 -2.44801 -0.25928  
H -5.59866 1.82557 -0.51722  
N -7.368 -0.1654 -0.2169  
C -8.24061 -1.05955 -0.89493  
C -9.37188 -1.58214 -0.24684  
C -7.98468 -1.43617 -2.22364  
C -10.22864 -2.45185 -0.91874  
H -9.57297 -1.30231 0.78234  
C -8.83734 -2.32103 -2.88081  
H -7.11613 -1.03227 -2.73392  
C -9.96657 -2.83139 -2.2369  
H -11.0991 -2.84616 -0.40066  
H -8.6228 -2.60096 -3.90898  
C -7.90186 0.85711 0.61349  
C -9.03249 1.58673 0.21044  
C -7.30675 1.1556 1.8503  
C -9.55714 2.5824 1.03214  
H -9.49421 1.36785 -0.74708  
C -7.828 2.16563 2.65652  
H -6.43658 0.59255 2.1723  
C -8.95791 2.88272 2.25731  
H -10.4326 3.13637 0.7031  
H -7.35383 2.38202 3.61042  
H 4.26524 -2.77503 6.14002  
H 2.81589 -0.81835 6.55668  
H 2.06505 0.63608 4.67723  
H 5.01099 -3.34134 3.83064  
H 7.97287 -3.43531 -0.18717  
H 9.96264 -2.96455 -1.61168  
H 9.96597 -1.06531 -3.19137  
H 7.97965 0.42522 -3.39825  
H 5.0259 4.36489 -2.57713  
H 4.28461 6.5339 -1.59944  
H 2.83234 6.58992 0.39824

H 2.07413 4.47838 1.48358  
H -10.6327 -3.51547 -2.75489  
H -9.36555 3.66456 2.8918

**SubPc(A2,NO<sub>2</sub>,H,H)**

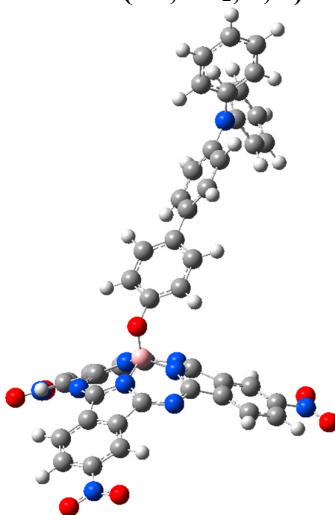

C 3.03715 3.31534 0.39504  
C 2.16925 2.78117 1.40087  
C 1.75315 3.56952 2.47739  
C 2.17938 4.89082 2.53418  
C 3.03155 5.39324 1.53601  
C 3.48809 4.63096 0.46645  
C 3.35494 2.22656 -0.5222  
C 1.96781 1.37342 1.08539  
H 1.10916 3.1584 3.24762  
H 4.15935 5.05693 -0.2687  
N 1.58629 0.35966 1.87604  
N 2.5678 1.17763 -0.12964  
N 4.38631 2.08332 -1.36569  
C 1.95688 -0.87491 1.51095  
C 3.33114 -2.2717 0.32916  
C 2.14678 -2.07582 2.31664  
C 3.00724 -2.94951 1.57737  
C 1.72522 -2.40777 3.60159  
C 3.44352 -4.15729 2.12941  
C 2.15647 -3.62925 4.10708  
H 1.08917 -1.75927 4.19096  
C 3.0006 -4.50265 3.40031  
H 4.10956 -4.81033 1.57536  
H 3.29533 -5.43356 3.86801  
C 4.74072 0.83249 -1.69726  
C 4.72895 -1.416 -1.2704  
C 6.02532 0.30841 -2.14165  
C 6.01804 -1.09869 -1.87473  
C 7.16742 0.93268 -2.65089  
C 7.14771 -1.87668 -2.11452  
C 8.28552 0.15206 -2.91767

H 7.1773 2.00144 -2.83706  
C 8.25548 -1.22658 -2.64711  
H 7.17802 -2.93876 -1.90591  
H 9.19043 0.58233 -3.32778  
N 3.99958 -0.26237 -1.34638  
N 2.55579 -1.14259 0.31029  
N 4.36363 -2.45553 -0.50721  
B 2.58982 -0.15862 -0.83751  
O 1.65119 -0.35506 -1.89371  
C 0.29063 -0.31426 -1.6887  
C -0.41308 -1.48758 -1.3992  
C -0.40771 0.88977 -1.82532  
C -1.79567 -1.44941 -1.23549  
H 0.13066 -2.42315 -1.30799  
C -1.7909 0.91608 -1.66385  
H 0.13763 1.79243 -2.08433  
C -2.51674 -0.24922 -1.36124  
H -2.32294 -2.36557 -0.98485  
H -2.32094 1.85392 -1.80432  
N 9.46236 -2.02359 -2.93374  
O 9.42054 -3.22818 -2.6881  
O 10.43633 -1.43432 -3.39957  
N 1.7122 -4.02319 5.45664  
O 2.10427 -5.10476 5.8919  
O 0.97778 -3.24533 6.06379  
H 1.87403 5.54923 3.33757  
N 3.47135 6.7973 1.63143  
O 4.21907 7.22061 0.75116  
O 3.06385 7.4579 2.5856  
C -3.98927 -0.2148 -1.18854  
C -4.80325 -1.27411 -1.62521  
C -4.62954 0.87881 -0.58076  
C -6.18327 -1.25144 -1.4561  
H -4.35003 -2.12952 -2.11855  
C -6.01054 0.92097 -0.42371  
H -4.03486 1.71031 -0.21247  
C -6.81275 -0.1486 -0.85513  
H -6.78351 -2.08757 -1.79988  
H -6.4752 1.78227 0.0452  
N -8.22042 -0.11576 -0.68856  
C -9.07293 -0.62839 -1.70608  
C -10.18567 -1.41645 -1.37125  
C -8.81712 -0.35117 -3.05863  
C -11.0255 -1.90694 -2.36939  
H -10.38609 -1.63933 -0.32808  
C -9.65212 -0.86163 -4.0508  
H -7.96336 0.2641 -3.32448  
C -10.76311 -1.63807 -3.71439  
H -11.88248 -2.51526 -2.09207  
H -9.43918 -0.63701 -5.09272

H -11.4159 -2.02804 -4.49009  
C -8.78765 0.42904 0.49727  
C -9.91137 1.26798 0.42762  
C -8.23579 0.13319 1.75411  
C -10.472 1.79005 1.5918  
H -10.3398 1.50519 -0.54101  
C -8.79227 0.67497 2.91127  
H -7.37224 -0.52145 1.8164  
C -9.91511 1.50226 2.8397  
H -11.34198 2.43754 1.51922  
H -8.35244 0.43493 3.8758  
H -10.35068 1.91661 3.74442

**SubPc(A2,F,F,F)**

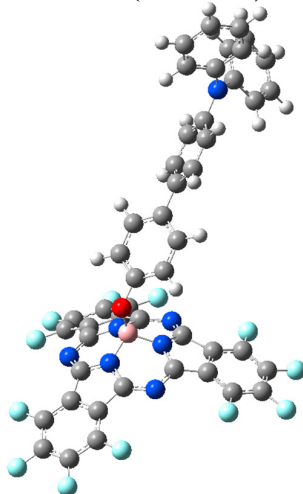

C 0. 0. 0.  
C 1.43427 0. 0.  
C 2.13387 1.20382 0.  
C 1.41899 2.39806 0.02271  
C 0.01536 2.39811 0.02278  
C -0.69951 1.20393 -0.00015  
C -0.42903 -1.38714 -0.10681  
C 1.86338 -1.38699 -0.1066  
N 3.02823 -1.90284 -0.52089  
N 0.71766 -2.12858 -0.00445  
N -1.59301 -1.90185 -0.52601  
C 3.0076 -3.15764 -0.98949  
C 1.8635 -4.93499 -1.87671  
C 3.9106 -3.83235 -1.91072  
C 3.19491 -4.94441 -2.46585  
C 5.19358 -3.53136 -2.35999  
C 3.77984 -5.72827 -3.45686  
C 5.77219 -4.33894 -3.33515  
C 5.07189 -5.42728 -3.87844  
C -1.57168 -3.15333 -1.00527  
C -0.42393 -4.92947 -1.89133  
C -2.46808 -3.8212 -1.93798  
C -1.74991 -4.9325 -2.49244

C -3.74641 -3.51542 -2.39698  
C -2.32803 -5.71018 -3.4921  
C -4.3185 -4.31725 -3.38062  
C -3.61588 -5.40447 -3.92311  
N -0.46746 -3.95617 -0.93218  
N 1.90012 -3.95841 -0.91761  
N 0.72141 -5.48364 -2.31273  
B 0.70495 -3.63952 -0.04907  
O 0.60222 -4.32964 1.19645  
C 1.5542 -4.22125 2.18348  
C 2.60711 -5.1395 2.2487  
C 1.4457 -3.22995 3.16429  
C 3.54399 -5.05507 3.27571  
H 2.68009 -5.91604 1.49309  
C 2.38624 -3.15637 4.18887  
H 0.6076 -2.54027 3.1302  
C 3.45815 -4.06238 4.26725  
H 4.36998 -5.76049 3.29632  
H 2.26972 -2.39927 4.95928  
C 4.45679 -3.97849 5.3605  
C 5.01269 -5.13434 5.93528  
C 4.88645 -2.73921 5.86536  
C 5.95627 -5.06074 6.95418  
H 4.69236 -6.11243 5.58705  
C 5.81471 -2.6541 6.89733  
H 4.49545 -1.82142 5.43483  
C 6.37033 -3.81634 7.45716  
H 6.37048 -5.97158 7.37433  
H 6.12274 -1.68205 7.26875  
N 7.32488 -3.73555 8.50367  
C 7.28131 -4.66185 9.58243  
C 8.46471 -5.22952 10.08155  
C 6.05563 -5.02071 10.16634  
C 8.41911 -6.12799 11.14585  
H 9.41525 -4.96151 9.63135  
C 6.01865 -5.93427 11.21808  
H 5.13728 -4.58034 9.79112  
C 7.19795 -6.49049 11.71822  
H 9.34514 -6.55745 11.51929  
H 5.06094 -6.20036 11.65786  
H 7.16574 -7.19668 12.54297  
C 8.32707 -2.72625 8.47917  
C 8.66377 -2.02857 9.65036  
C 8.99641 -2.41376 7.28488  
C 9.65369 -1.04802 9.62457  
H 8.14645 -2.26042 10.57591  
C 9.97184 -1.41865 7.26524  
H 8.74707 -2.95399 6.3771  
C 10.31078 -0.7325 8.4334  
H 9.90131 -0.51813 10.54073



H 10.47951 -1.19 6.33175  
H 11.07677 0.0375 8.41569  
F 3.13918 -6.76373 -4.00187  
F 5.66622 -6.17695 -4.80927  
F 7.01008 -4.08819 -3.76681  
F 5.88327 -2.49863 -1.87352  
F -1.68478 -6.74398 -4.03696  
F -4.20379 -6.14842 -4.8625  
F -5.55222 -4.06189 -3.82138  
F -4.43814 -2.48351 -1.91111  
F -2.03298 1.24063 -0.01  
F -0.62964 3.56645 0.04816  
F 2.06403 3.56639 0.04782  
F 3.46715 1.24069 -0.01044

**SubPc(A3,H,H,H)**

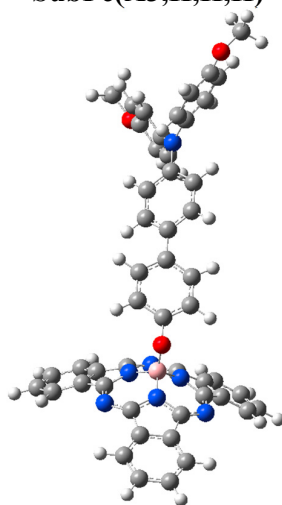

C 4.77514 2.67086 -2.06057  
C 3.9331 3.05982 -0.97107  
C 3.54994 4.39339 -0.81085  
C 3.98637 5.32206 -1.75204  
C 4.81549 4.93947 -2.82403  
C 5.2281 3.61895 -2.98101  
C 5.06663 1.2526 -1.89195  
C 3.72013 1.87495 -0.14941  
N 3.35551 1.76856 1.1373  
N 4.28758 0.8394 -0.84312  
N 6.07691 0.51446 -2.37704  
C 3.71205 0.65087 1.78803  
C 5.05086 -1.19482 1.98207  
C 3.91587 0.4169 3.21219  
C 4.75323 -0.73692 3.33366  
C 3.52848 1.13557 4.34543  
C 5.19755 -1.1625 4.5877  
C 3.95623 0.68297 5.5908  
C 4.78089 -0.45216 5.71044  
C 6.42031 -0.58817 -1.6929

C 6.41249 -1.8104 0.24207  
C 7.69059 -1.30043 -1.63059  
C 7.68571 -2.06473 -0.42055  
C 8.82315 -1.27216 -2.44749  
C 8.81342 -2.79438 -0.03752  
C 9.92954 -2.02688 -2.06673  
C 9.92473 -2.77886 -0.87622  
N 5.68397 -1.06191 -0.64155  
N 4.27932 -0.42239 1.15399  
N 6.06111 -1.95345 1.52967  
B 4.2945 -0.58421 -0.34541  
O 3.32046 -1.47601 -0.91143  
C 1.9709 -1.2679 -0.7883  
C 1.26066 -1.84426 0.27114  
C 1.27681 -0.52717 -1.75212  
C -0.11773 -1.67055 0.36673  
H 1.79982 -2.42537 1.01327  
C -0.10216 -0.36233 -1.64929  
H 1.82525 -0.10515 -2.5889  
C -0.83185 -0.92542 -0.58778  
H -0.64697 -2.10275 1.21164  
H -0.62697 0.19075 -2.42351  
C -2.29994 -0.74468 -0.48238  
C -3.13411 -1.76904 -0.00241  
C -2.9199 0.45959 -0.85784  
C -4.51011 -1.60154 0.10848  
H -2.69893 -2.72375 0.28021  
C -4.29678 0.63305 -0.76999  
H -2.31038 1.28459 -1.21655  
C -5.11982 -0.39543 -0.27876  
H -5.12281 -2.41244 0.48871  
H -4.74195 1.57473 -1.07435  
N -6.52065 -0.22155 -0.17717  
C -7.40193 -1.31643 -0.40773  
C -8.46816 -1.57339 0.46094  
C -7.23102 -2.15717 -1.52233  
C -9.35215 -2.62961 0.22874  
H -8.61389 -0.93561 1.3273  
C -8.09128 -3.22261 -1.74672  
H -6.41254 -1.97003 -2.21043  
C -9.16385 -3.46681 -0.87623  
H -10.16885 -2.79394 0.92257  
H -7.96064 -3.87442 -2.60505  
C -7.067 1.04974 0.15953  
C -8.15418 1.57303 -0.54888  
C -6.53711 1.80383 1.22209  
C -8.71241 2.80757 -0.20936  
H -8.57476 1.00529 -1.37309  
C -7.07149 3.0417 1.55022  
H -5.6972 1.41146 1.78687

C -8.16792 3.55417 0.84108  
 H -9.55714 3.17733 -0.77955  
 H -6.66337 3.62676 2.36865  
 O -9.95867 -4.53347 -1.19429  
 O -8.6253 4.77597 1.25228  
 C -11.05139 -4.82862 -0.34166  
 H -11.54216 -5.70291 -0.77367  
 H -10.71753 -5.06786 0.67715  
 H -11.76756 -3.99674 -0.29762  
 C -9.72675 5.34191 0.56337  
 H -9.92279 6.30117 1.04636  
 H -9.49774 5.5113 -0.49754  
 H -10.62144 4.70902 0.63979  
 H 5.10063 -0.77473 6.69736  
 H 3.65365 1.21656 6.48745  
 H 2.90704 2.02047 4.24957  
 H 5.84781 -2.02725 4.67666  
 H 8.8143 -3.35935 0.88947  
 H 10.80708 -3.3526 -0.60683  
 H 10.81552 -2.03335 -2.69545  
 H 8.83146 -0.67785 -3.35592  
 H 5.88181 3.32546 -3.79652  
 H 5.14202 5.69099 -3.53739  
 H 3.68735 6.36215 -1.6568  
 H 2.92524 4.68928 0.02621

**SubPc(A3,F,F,F)**

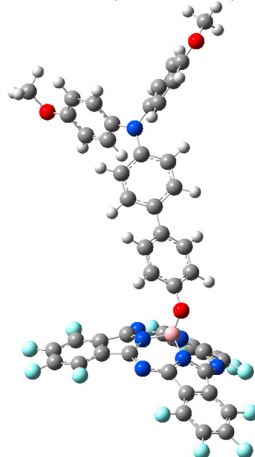

C 3.60536 3.15228 -1.08872  
 C 2.73628 3.11701 0.05168  
 C 2.33945 4.3019 0.66578  
 C 2.78158 5.51311 0.14105  
 C 3.63222 5.54766 -0.97486  
 C 4.05661 4.37166 -1.58684  
 C 3.91838 1.7725 -1.43234  
 C 2.52929 1.71627 0.39023  
 N 2.14115 1.15283 1.54195  
 N 3.12525 1.0089 -0.61827

N 4.94517 1.26722 -2.12937  
C 2.49701 -0.12213 1.74768  
C 3.85396 -1.91148 1.28791  
C 2.66631 -0.8624 2.98981  
C 3.51516 -1.98212 2.70223  
C 2.25283 -0.61508 4.29605  
C 3.9296 -2.8273 3.72812  
C 2.6581 -1.483 5.30622  
C 3.4886 -2.57891 5.02485  
C 5.28429 -0.00596 -1.88342  
C 5.25195 -1.85021 -0.52163  
C 6.55379 -0.6953 -2.06447  
C 6.53356 -1.84927 -1.21234  
C 7.70062 -0.38055 -2.7884  
C 7.66069 -2.65954 -1.10551  
C 8.81072 -1.21433 -2.68766  
C 8.79094 -2.34331 -1.85396  
N 4.53841 -0.83134 -1.08883  
N 3.09232 -0.89099 0.78487  
N 4.88005 -2.45212 0.6168  
B 3.13256 -0.502 -0.67543  
O 2.18875 -1.12831 -1.54277  
C 0.82903 -0.99657 -1.37216  
C 0.12037 -1.939 -0.62036  
C 0.13583 0.04579 -1.99585  
C -1.26131 -1.82754 -0.48493  
H 0.66022 -2.75509 -0.14921  
C -1.24655 0.14546 -1.85738  
H 0.68438 0.75558 -2.60795  
C -1.97753 -0.78363 -1.0964  
H -1.79219 -2.55312 0.12499  
H -1.77264 0.94351 -2.37375  
C -3.44863 -0.67079 -0.95041  
C -4.27172 -1.80899 -0.90386  
C -4.08224 0.57978 -0.85171  
C -5.65064 -1.70981 -0.75776  
H -3.82609 -2.79573 -0.9968  
C -5.46168 0.69355 -0.72208  
H -3.4823 1.48579 -0.86349  
C -6.27534 -0.45265 -0.66789  
H -6.25395 -2.61077 -0.72071  
H -5.91652 1.67613 -0.65328  
N -7.67675 -0.34456 -0.52736  
C -8.54135 -1.3029 -1.13206  
C -9.5942 -1.87285 -0.4087  
C -8.36844 -1.68418 -2.47457  
C -10.46349 -2.7922 -1.00027  
H -9.7412 -1.58944 0.62895  
C -9.21386 -2.61425 -3.06265  
H -7.56062 -1.24691 -3.05316

C -10.27311 -3.17418 -2.3328  
H -11.27055 -3.20917 -0.40859  
H -9.08242 -2.91241 -4.09821  
C -8.24943 0.72408 0.22208  
C -9.32737 1.45639 -0.28619  
C -7.75739 1.05547 1.49713  
C -9.91329 2.4873 0.4519  
H -9.71894 1.21352 -1.26921  
C -8.31917 2.09353 2.22678  
H -6.92563 0.49337 1.91036  
C -9.40616 2.81696 1.71361  
H -10.75004 3.02938 0.0261  
H -7.94078 2.3535 3.21055  
F 4.72666 -3.87208 3.49788  
F 3.85053 -3.38732 6.0236  
F 2.25687 -1.28385 6.56367  
F 1.4727 0.42287 4.60076  
F 7.68009 -3.73387 -0.31492  
F 9.87692 -3.11689 -1.78967  
F 9.91485 -0.95011 -3.38977  
F 7.75761 0.6903 -3.58188  
F 4.87344 4.4407 -2.63938  
F 4.02953 6.73149 -1.44679  
F 2.39707 6.6652 0.69492  
F 1.54068 4.30559 1.73395  
O -11.05348 -4.07026 -3.00866  
O -9.89259 3.81026 2.51699  
C -12.13379 -4.67137 -2.31513  
H -12.61436 -5.34131 -3.03062  
H -11.78643 -5.25374 -1.45104  
H -12.86244 -3.9235 -1.97391  
C -10.9869 4.57669 2.04325  
H -11.20909 5.30074 2.82944  
H -10.73557 5.1128 1.11811  
H -11.8727 3.95168 1.86608

**Table S2.** Q-Band ( $\lambda_{\max}$ ) excitation energies in vacuum, oscillator strengths  $f$  and dominant electronic transitions, for the SubPcs included in this study

| An | R <sub>1</sub>                  | R <sub>2</sub>                  | R <sub>3</sub> | $\lambda_{\max}$ (eV) | nm     | $f$    | Main Configuration |
|----|---------------------------------|---------------------------------|----------------|-----------------------|--------|--------|--------------------|
| A1 | H                               | H                               | H              | 2.49                  | 498.9  | 0.2856 | H-1->L+0(+85%)     |
|    |                                 |                                 |                | 2.50                  | 496.70 | 0.3125 | H-1->L+1(+85%)     |
| A1 | F                               | F                               | F              | 2.42                  | 512.9  | 0.2997 | H-1->L+0(+85%)     |
|    |                                 |                                 |                | 2.43                  | 510.4  | 0.3276 | H-1->L+1(+85%)     |
| A1 | SO <sub>2</sub> H               | H                               | H              | 2.46                  | 504.4  | 0.3401 | H-1->L+0(+96%)     |
|    |                                 |                                 |                | 2.47                  | 502.0  | 0.3726 | H-1->L+1(+95%)     |
| A1 | SO <sub>2</sub> CH <sub>3</sub> | SO <sub>2</sub> CH <sub>3</sub> | H              | 2.42                  | 511.8  | 0.4257 | H-1->L+0(+96%)     |
|    |                                 |                                 |                | 2.43                  | 509.2  | 0.4623 | H-1->L+1(+95%)     |
| A1 | SO <sub>2</sub> CH <sub>3</sub> | H                               | H              | 2.46                  | 504.0  | 0.3456 | H-1->L+0(+96%)     |
|    |                                 |                                 |                | 2.47                  | 501.5  | 0.3774 | H-1->L+1(+96%)     |
| A1 | NO <sub>2</sub>                 | H                               | H              | 2.31                  | 536.6  | 0.3316 | H-1->L+0(+96%)     |
|    |                                 |                                 |                | 2.32                  | 534.1  | 0.3567 | H-1->L+1(+96%)     |
| A1 | NO <sub>2</sub>                 | NO <sub>2</sub>                 | H              | 2.31                  | 536.9  | 0.3058 | H-1->L+0(+82%)     |
|    |                                 |                                 |                | 2.33                  | 532.4  | 0.3875 | H-1->L+1(+91%)     |
| A2 | H                               | H                               | H              | 2.49                  | 498.6  | 0.2886 | H-1->L+0(+96%)     |
|    |                                 |                                 |                | 2.5                   | 496.8  | 0.3186 | H-1->L+1(+95%)     |
| A2 | NO <sub>2</sub>                 | H                               | H              | 2.31                  | 535.8  | 0.3331 | H-1->L+0(+95%)     |
|    |                                 |                                 |                | 2.32                  | 534.0  | 0.3598 | H-1->L+1(+95%)     |
| A2 | F                               | F                               | F              | 2.42                  | 511.9  | 0.293  | H-1->L+0(+92%)     |
|    |                                 |                                 |                | 2.43                  | 509.5  | 0.3247 | H-1->L+1(+92%)     |
| A3 | H                               | H                               | H              | 2.49                  | 498.4  | 0.2872 | H-1->L+0(+95%)     |
|    |                                 |                                 |                | 2.5                   | 496.8  | 0.3199 | H-1->L+1(+95%)     |
| A3 | F                               | F                               | F              | 2.42                  | 512.1  | 0.3025 | H-2->L+0(+95%)     |
|    |                                 |                                 |                | 2.43                  | 509.9  | 0.3378 | H-2->L+1(+95%)     |
